# Supplementary material for: Machine learning-driven identification of the gene-expression signature associated with a persistent multiple organ dysfunction trajectory in critical illness
Source: PubMed Central journal article supplement — eBioMedicine. 2023 Dec 23;99:104938. doi: 10.1016/j.ebiom.2023.104938 (PMC10788426; doi:10.1016/j.ebiom.2023.104938), 2023-12-23
Supplement: mmc2.pdf [file mmc2.pdf]

1 **Online supplement:**

2  
3 Title: Machine learning driven identification of the gene-expression signature associated  
4 with a persistent multiple organ dysfunction trajectory in critical illness.

5  
6 Authors: Mihir R. Atreya<sup>1,2\*</sup>, Shayantan Banerjee<sup>3\*</sup>, Andrew J. Lautz<sup>1,2</sup>, Matthew N.  
7 Alder<sup>1,2</sup>, Brian M. Varisco<sup>1,2</sup>, Hector R. Wong<sup>1,2</sup>, Jennifer A. Muszynski<sup>4,5</sup>, Mark W.  
8 Hall<sup>4,5</sup>, L. Nelson Sanchez-Pinto<sup>6,7</sup>, and Rishikesan Kamaleswaran<sup>8,9</sup> for the Genomics  
9 of Pediatric Septic Shock Investigators.

10  
11 Author affiliations:

- 12 1. Division of Critical Care Medicine, Cincinnati Children's Hospital Medical Center  
13 and Cincinnati Children's Research Foundation, Cincinnati, 45229, OH, USA.
- 14 2. Department of Pediatrics, University of Cincinnati College of Medicine,  
15 Cincinnati, OH 45267, USA.
- 16 3. Department of Biotechnology, Bhupat and Jyoti Mehta School of Biosciences,  
17 Indian Institute of Technology Madras, Chennai, 600 036, India.
- 18 4. Division of Critical Care Medicine, Nationwide Children's Hospital, Columbus,  
19 43205, OH, USA.
- 20 5. Department of Pediatrics, Ohio State University, Columbus, 43205, OH, USA.
- 21 6. Department of Pediatrics, Northwestern University Feinberg School of Medicine,  
22 Chicago, 60611, IL, USA.
- 23 7. Department of Health and Biomedical Informatics, Northwestern University  
24 Feinberg School of Medicine, Chicago, 60611, IL, USA.
- 25 8. Department of Biomedical Informatics, Emory University School of Medicine,  
26 Atlanta, 30322, GA, United States.
- 27 9. Department of Biomedical Engineering, Georgia Institute of Technology, Atlanta,  
28 30322, GA, United States.

29  
30 Corresponding author:

31 Mihir R Atreya, MD, MPH  
32 Cincinnati Children's Hospital Medical Center  
33 Division of Critical Care Medicine, MLC2005  
34 3333 Burnet Avenue  
35 Cincinnati, OH, 45229, USA  
36 Tel: 513-636-1697  
37 Email: [Mihir.Atreya@cchmc.org](mailto:Mihir.Atreya@cchmc.org)

1  
2  
3  
4  
5  
6  
7  
8  
9  
10  
11  
12  
13  
14  
15  
16  
17  
18  
19  
20  
21  
22  
23  
24  
25  
26  
27  
28  
29  
30  
31  
32  
33  
34  
35  
36  
37  
38  
39  
40  
41  
42  
43  
44  
45  
46

**Table of contents:**

1. Supplemental Methods.....3  
2. Supplementary Tables.....8  
3. Supplementary Figure Legend.....15  
4. Supplementary Figures..... 16  
5. References.....18

## Supplementary Methods:

### 1. Pre-processing of gene expression data in training dataset (GSE66099).

**Batch correction:** Our study considered the year of measurement of the gene expression data as the batch variable. Ideally, batch corrections are possible only if the variables are not highly correlated with the outcome (MODS in our dataset).

As shown in **supplementary Table 2**, a tight correlation between the batch variable (year) and the outcome of interest is absent. Within each batch, we had measurements from multiple different groups. So, we proceeded with the batch effect removal process.

The 'sva' package in R was used to identify batch effects in our data. Although we had prior information regarding the batch variable (the year of measurement), we wanted to check if SVA could find new covariates explaining the variation in our data. The 'sv' component returned by the sva function contained the two new covariates or the potential batch effects. To check if the new surrogate variables (or SVs) are associated with the observed batch variable, a linear model is fit using the lm() in R. From **supplementary Table 3**, we can observe that the second estimated surrogate variable has a significant correlation with the batch variable. In this case, the coefficient tells us that by changing the batch variable, the value of the SV changes by 8.03, and this result is significant ( $P=9e-05$ ). This shows that the estimated SV is associated with the batch.

### 2. Derivation of stable features.

The workflow adopted for our machine learning analysis is shown in **Figure 1** (main text). The entire process can be subdivided into three parts. Here, we discuss each part in detail:

A typical machine learning workflow involves dividing the available data into three groups: Train, Validation, and Test. The sample of the data used to fit the model is referred to as the training set. The validation set is used to tune the model's hyperparameters and to derive the best model configuration. The test set provides an unbiased evaluation of the best model derived from the training and the validation set.

#### **PART A: Stratified Cross-Validation**

Whenever we are provided with a limited data sample, we train and evaluate our models using Cross-Validation approach. K-fold cross-validation requires a single parameter k, which refers to the number of groups the given data sample is split into. In our case, we chose  $k=5$ .

The general procedure to derive the cross-validation results is as follows:

- Randomly shuffle the data
- Split the dataset into 5 equal-sized subsets
- For each subset,
- Consider one subset as a hold-out or a test set
- Take the remaining four subsets as a single training set
- Derive the best set of hyperparameters and train the model using the training set and test it on the test set.

- Calculate the evaluation metrics such as Sensitivity, Specificity, MCC, and AUC.
- The final results are the average classification metrics calculated across all five folds.

**Stratified k-fold cross-validation:** The derivation set (GSE66099) used to identify the set of candidate biomarkers had 46 patients with persistent MODS and 155 patients with resolving or no MODS labels. Due to the skewed class distribution, we used Stratified k-fold cross-validation instead of normal k-fold. The class distribution of the dataset was preserved in each of the train-test splits.

## PART B:

### Dimensionality reduction.

Scaling: We scaled our features (genes) using a popular normalization technique called Min-Max scaling. All the feature values were shifted and scaled so that ended up in the 0-1 range. Below is the formula for Min-Max scaling:

$$X = (X - X_{\min}) / (X_{\max} - X_{\min})$$

$X_{\max}$  and  $X_{\min}$  are the maximum and minimum values of a given feature respectively.

**Feature Selection (Stage I)** Gene expression data is usually highly redundant and highly dimensional (containing measurements from thousands of genes). Thus, dimensionality reduction is necessary to distinguish noise from the true signal.

We used 3 feature selection techniques on our scaled derivation dataset, in addition to conventional differential expression of gene (DEG) analyses.

**A. LASSO:** The Least Absolute Shrinkage and Selection Operator is a powerful method that performs both regularization and feature selection simultaneously<sup>1</sup>.

A linear regression model can be expressed as follows:

$Y_i = \beta_0 + x_{i1}\beta_1 + \dots + x_{ik}\beta_k + \epsilon_i$ , where  $i=1\dots n$  where  $Y_i$  is the response variable, the parameters  $\beta_0, \beta_1, \dots, \beta_k$  are the regression coefficients, and we have  $k$  number of explanatory variables. The random error or  $\epsilon_i$  is assumed to have 0 mean and constant variance. Assuming  $n$  samples in total, the vector notation used to represent the above formula is:  $Y = X\beta + \epsilon$ , where  $Y$  is the  $(n \text{ by } 1)$  response vector,  $X$  is the  $(n \text{ by } k)$  design matrix representing the  $k$  features,  $\beta$  is the  $(k \text{ by } 1)$  coefficient vector and  $\epsilon$  is the  $(n \text{ by } 1)$  error vector.

The main goal of linear regression is to fit a straight line to several points, minimizing the squared residuals. LASSO minimizes the sum of squared residuals while placing an upper bound on the model parameters' absolute sum.

Using the formulation used by Buhlmann and van de Geer [3], we get

$\text{minimize} ( \sum_{i=1}^n ||Y - X\beta||^2 ) / n$  subject to  $\sum_{j=1}^k ||\beta_j|| \leq t$

where  $t$  is the upper bound for the sum of the coefficients. This is equivalent to solving

$(\beta)^\lambda = \text{argmi} ( \sum_{i=1}^n ||Y - X\beta||^2 ) / n + \lambda \sum_{j=1}^k ||\beta_j||$  where  $\sum_{i=1}^n ||Y - X\beta||^2 = \sum_{i=1}^n ( Y_i - (X\beta)_i )^2$ ,  $\sum_{j=1}^k ||\beta_j|| = \sum_{j=1}^k |\beta_j|$

1 and  $\lambda$  is the shrinkage parameter that controls the amount of penalty that must be  
2 applied to the  $\beta$ 's. When we solve this optimization problem, some of the coefficients  
3 are shrunk to zero and as a result, the features corresponding to those coefficients are  
4 excluded from the model. This makes LASSO a powerful feature selection technique.

5  
6 We implemented the LassoCV function from the linear\_model module for feature  
7 selection purposes. This function uses cross-validation to choose the best model, and  
8 we used the default 5-fold cross-validation splitting strategy.

9  
10 **2. MRMR:** Minimum Redundancy Maximum Relevance is a feature selection algorithm  
11 to find a small subset of features by considering the correlations between the features  
12 and their importance.<sup>2</sup> If two highly correlated features are also highly relevant, then  
13 adding both of them would increase the model complexity. So for a set of S features,  
14 the relevance between them is defined as, and the redundancy is denoted by  $R =$   
15  $1/(|S| \binom{|S|}{2}) \sum_{(x_i, x_j \in S)} I(x_i, x_j)$ , where I is the mutual  
16 information operator. The mRMR score for the set S is given by (D-R). The goal is to  
17 find the subset of features S with the maximum (D-R). We used the Python wrapper  
18 named "pymrmr" that was published with the original paper, and selected the top 10  
19 important features using this method.

20  
21 **3. Random Forests based variable importance technique:** Random forests comprise  
22 several decision trees trained on a random subset of observations using a random  
23 subset of features.<sup>3</sup> No single tree sees all the features or all the samples at once, and  
24 this makes it less prone to overfitting. Each tree, in turn, is a series of yes/no questions  
25 based on a combination of features. At each question (or node), the tree divides into  
26 two branches containing samples that are more similar to one another and different  
27 from the ones in the other branch. Thus, the importance of each feature is based on  
28 how "pure" (containing samples belonging to a single class) each of the branches is.

29  
30 We used the RandomForestClassifier function from the ensemble module and a  
31 collection of 100 estimators to derive the feature importance. We finally selected the top  
32 10 ranked features for our feature pool.

33  
34 We added the DEGs identified from our analysis in the training dataset to the genes  
35 chosen by each of the above three feature selection strategies. This formed our pooled  
36 list of features, which was then passed onto the next feature selection stage.

37  
38 **Feature Selection Stage II (Recursive Feature Elimination):** Our main goal was to  
39 identify a small subset of features to remove redundancy and avoid overfitting. This final  
40 feature selection approach tries to remove redundant features from the pooled feature  
41 set by recursively removing them and building a model on those that remain. This  
42 process is also known as Recursive Feature Elimination. This ensures that our final set  
43 of features obtained after this stage contributes most to the output.

44  
45 The REFCV function from the feature selection module was used to implement this final  
46 feature selection strategy. For each classifier implemented in our study, the RFECV

1 function was called with a 3-fold cross-validation splitting strategy, and a “roc\_auc”  
2 method of scoring was used as the function parameters.

### 3 4 **Part C: Model fitting**

5 After finding the optimal set of features from the high-dimensional gene expression  
6 data, the next step was to use these features to train our model. Hyperparameter tuning  
7 is a very crucial step in finding the best set of parameters for a given classifier. Grid  
8 search uses an exhaustive search and evaluation strategy for a given classifier to  
9 achieve this objective. It checks for every combination of hyperparameters in the grid,  
10 evaluates the model based on predefined metrics, and outputs the combination that  
11 gives the best results. It is a bit computationally expensive, especially if one uses a  
12 cross-validated grid search technique to search for the optimal parameters in a  
13 parameter grid.

14  
15 The GridSearchCV function from the model\_selection module with the default 3-fold  
16 cross-validation strategy and a “roc\_auc” scoring metric was used to search for the best  
17 set of hyperparameters.

18  
19 **Derivation of the final set of stable features (genes) from the cross-validation**  
20 **experiments:** All the steps of the machine learning workflow discussed up to this point  
21 are based on a single run of the 5-fold cross-validation experiment. We repeated this  
22 process seven times, choosing a different 5-fold split every time. Hence, we had 35  
23 highly relevant features that were predictive of a MODS outcome.

24  
25 We used the RepeatedStratifiedKFold function from the model\_selection module in  
26 scikit-learn to perform our cross-validation experiments.

27  
28 The fraction of times a particular feature was chosen out of the 35 runs was used to  
29 rank the genes from strongest association to weakest. Genes associated with outcome  
30 of interest in  $\geq 80\%$  of repeated cross-fold validation experiments were chosen for  
31 downstream analyses and optimization.

32  
33 **Determining an optimal set of parameters using the validation dataset (E-MTAB-**  
34 **10938).** Our overall goal was to derive a single classifier and test its generalizability  
35 using independent test cohorts. We tuned the parameters for our classifier using an  
36 independent pediatric dataset (E-MTAB-10938).

37  
38 Following is the list of parameters used to define that classifier:

39  
40 **The scaling technique:** Different scaling techniques were implemented to transform  
41 the dataset used to validate and test the machine learning models. Three scaling  
42 techniques were experimented with: Standard Scaler, Minmax Scaler, and Robust  
43 Scaler.

1 **Number of top stable features:** A list of 111 stable genes was identified through  
2 repeated cross-validation experiments. The tunable parameter was combination of the  
3 top n genes (n=5,10,15...111).  
4

5 **The sampling technique-classifier combination:** Owing to data imbalance, we  
6 experimented with different undersampling (random undersampling, Repeated Edited  
7 Nearest Neighbours, Cluster Centroids, Instance Hardness Threshold, NearMiss,  
8 Edited Nearest Neighbours, Tomek Links, All KNN, Condensed Nearest Neighbour,  
9 One-Sided Selection), and oversampling (SMOTE, Random OverSampler, ADASYN,  
10 KMeans SMOTE, Borderline SMOTE, SVM SMOTE) techniques to balance the class  
11 distribution better so that standard machine learning techniques can be implemented  
12 directly.  
13

14 Binary classifiers such as Naive Bayes, Linear Discriminant Analysis, Support Vector  
15 machines, K-nearest neighbors, Decision trees, Random forests, ExtraTrees, and  
16 AdaBoost were implemented to differentiate between persistent and resolving MODS.  
17

18 **Classification thresholds:** Many machine learning classifiers can generate a  
19 classification probability before it gets mapped to a class label. Using the default  
20 threshold of 0.5 for imbalanced classification problems may lead to misleading results.  
21 A simple approach is tuning the threshold to map probabilities to class labels. We  
22 employ a grid search technique for the best threshold between 0 and 1 with step size  
23 0.001.  
24

25 The classifier built using the best parameters from 1-4 above was implemented on the  
26 two independent datasets (GSE144406 and E-MTAB-5882).  
27  
28  
29  
30  
31  
32  
33  
34  
35  
36  
37  
38  
39  
40  
41  
42  
43  
44  
45  
46

1 **Supplementary Tables:**  
 2  
 3

4 **Table 1.** Characteristics of gene-expression datasets including training, validation, and  
 5 test sets used in the study.  
 6  
 7

| Type       | Database name (Dataset ID)  | Platform                                    | Collection timepoint and follow-ups (if any)                | Mean Age (in yrs.) | Total sample size included in analyses. |
|------------|-----------------------------|---------------------------------------------|-------------------------------------------------------------|--------------------|-----------------------------------------|
| Training   | GEO (GSE66099)              | Affymetrix Human Genome U133 Plus 2.0 Array | Day 1 of meeting pediatric septic shock criteria.           | 3.6 ± 3.1          | 201                                     |
| Validation | ArrayExpress (E-MTAB-10938) | Illumina HiSeq 4000                         | Within 48 hours of meeting pediatric septic shock criteria. | 0.8 ± 0.5          | 32                                      |
| Test       | GEO (GSE144406)             | Illumina NextSeq 500                        | At diagnosis of MODS, 72 hours after, and eight days later  | 6.8 ± 6.3          | 61                                      |
| Test       | Array Express (E-MTAB-5882) | Illumina Human HT-12 v4 Expression Beadchip | Hyperacute period within two h, 24h and 72 h of injury.     | 37.9 ±15.4         | 84                                      |

8  
 9  
 10  
 11  
 12  
 13  
 14  
 15  
 16  
 17  
 18  
 19  
 20  
 21

All datasets used biospecimens isolated from peripheral whole blood collected in RNA stabilization tubes.



1 **Table 2:** Number of gene expression measurements made by year for the training  
2 dataset (GSE66099) by group of interest.

3

| <b>Outcome</b>       | <b>2004</b> | <b>2005</b> | <b>2006</b> | <b>2007</b> | <b>2008</b> | <b>2010</b> |
|----------------------|-------------|-------------|-------------|-------------|-------------|-------------|
| Persistent MODS      | 2           | 7           | 5           | 8           | 5           | 17          |
| Resolving or No MODS | 7           | 40          | 14          | 23          | 23          | 50          |

4  
5  
6  
7  
8  
9  
10  
11  
12  
13  
14  
15  
16  
17  
18  
19  
20  
21  
22  
23  
24  
25  
26  
27  
28  
29  
30  
31  
32  
33  
34  
35  
36  
37  
38  
39  
40  
41

1 **Table 3:** Results of regressing the surrogate variables returned by the sva() and the  
 2 actual batch effects.  
 3

| Formula                                  | Coefficients |          |            |                    |
|------------------------------------------|--------------|----------|------------|--------------------|
|                                          | Components   | Estimate | Std. Error | Significance level |
| Surrogate Variable<br>1 ~ Batch variable | Intercept    | 2007.45  | 0.146      | <2e-16             |
|                                          | Batch        | 2.6029   | 2.08       | 0.213              |
| Surrogate Variable<br>2 ~ Batch variable | Intercept    | 2007.45  | 0.14       | <2e-16             |
|                                          | Batch        | 8.03     | 2.01       | 9e-05              |

4  
 5  
 6  
 7  
 8  
 9  
 10  
 11  
 12  
 13  
 14  
 15  
 16  
 17  
 18  
 19  
 20  
 21  
 22  
 23  
 24  
 25  
 26  
 27  
 28  
 29  
 30  
 31

1 **Table 4.** Organ dysfunctions by MODS trajectory on day 1, 3, and 7 of septic shock  
 2 diagnosis in the training dataset (GSE66099).  
 3  
 4

|                | Persistent MODS | Resolving MODS | P value |
|----------------|-----------------|----------------|---------|
| Day 1 MODS     | N=44            | N=63           | 0.74    |
| Cardiovascular | 43              | 57             | 0.57    |
| Respiratory    | 44              | 45             | 0.67    |
| Renal          | 36              | 11             | <0.01   |
| Hepatic        | 22              | 5              | <0.01   |
| Hematologic    | 33              | 13             | <0.01   |
| Neurologic     | 9               | 0              | <0.01   |
|                |                 |                |         |
| Day 3 MODS     | N=44            | N=26           | <0.01   |
| Cardiovascular | 38              | 32             | <0.01   |
| Respiratory    | 43              | 29             | <0.01   |
| Renal          | 36              | 8              | <0.01   |
| Hepatic        | 23              | 4              | <0.01   |
| Hematologic    | 28              | 12             | <0.01   |
| Neurologic     | 14              | 0              | <0.01   |
|                |                 |                |         |
| Day 7 MODS     | N=46            | N=0            | <0.01   |
| Cardiovascular | 32              | 3              | <0.01   |
| Respiratory    | 42              | 7              | <0.01   |
| Renal          | 34              | 4              | <0.01   |
| Hepatic        | 23              | 1              | <0.01   |
| Hematologic    | 24              | 1              | <0.01   |
| Neurologic     | 14              | 0              | <0.01   |

5  
 6  
 7  
 8  
 9  
 10  
 11  
 12  
 13  
 14  
 15  
 16  
 17  
 18  
 19  
 20  
 21  
 22  
 23

1 **Table 5.** Organ support on day 1, 3, and 7 of septic shock diagnosis in the training  
 2 dataset (GSE66099).

|                     | Persistent MODS | Resolving MODS | P value |
|---------------------|-----------------|----------------|---------|
| Day 1 MODS          | N=44            | N=63           | 0.74    |
| Vasoactive support  | 39              | 45             | 0.26    |
| Ventilatory support | 41              | 35             | 0.03    |
| Renal replacement   | 13              | 1              | <0.01   |
|                     |                 |                |         |
| Day 3 MODS          | N=44            | N=26           | <0.01   |
| Vasoactive support  | 37              | 32             | <0.01   |
| Ventilatory support | 43              | 29             | <0.01   |
| Renal replacement   | 21              | 1              | <0.01   |
|                     |                 |                |         |
| Day 7 MODS          | N=46            | N=0            | <0.01   |
| Vasoactive support  | 32              | 4              | <0.01   |
| Ventilatory support | 42              | 8              | <0.01   |
| Renal replacement   | 22              | 1              | <0.01   |

3  
 4  
 5  
 6  
 7  
 8  
 9  
 10  
 11  
 12  
 13  
 14  
 15  
 16  
 17  
 18  
 19  
 20  
 21  
 22  
 23  
 24  
 25  
 26  
 27  
 28  
 29  
 30  
 31  
 32  
 33

1 **Table 6.** Genes features (n=111) identified through supervised machine learning  
 2 predictive of a persistent MODS trajectory in the training dataset (GSE66099), listed in  
 3 decreasing order of strength of association upon repeated cross-validation experiments.  
 4

| #  | Gene            | Fraction | #  | Gene            | Fraction | #   | Gene            | Fraction |
|----|-----------------|----------|----|-----------------|----------|-----|-----------------|----------|
| 1  | <i>RETN</i>     | 1.000    | 38 | <i>PNPLA6</i>   | 0.886    | 75  | <i>RASGRP1</i>  | 0.828    |
| 2  | <i>ADAMTS3</i>  | 1.000    | 39 | <i>LTF</i>      | 0.886    | 76  | <i>PTX3</i>     | 0.828    |
| 3  | <i>LDHA</i>     | 1.000    | 40 | <i>HLA-DPA1</i> | 0.886    | 77  | <i>HIPK2</i>    | 0.828    |
| 4  | <i>LCN2</i>     | 1.000    | 41 | <i>MS4A4A</i>   | 0.886    | 78  | <i>CD86</i>     | 0.828    |
| 5  | <i>IL1R2</i>    | 1.000    | 42 | <i>CENPW</i>    | 0.886    | 79  | <i>ELANE</i>    | 0.828    |
| 6  | <i>DDIT4</i>    | 0.971    | 43 | <i>FGFBP2</i>   | 0.886    | 80  | <i>LY9</i>      | 0.828    |
| 7  | <i>CEACAM8</i>  | 0.971    | 44 | <i>CEACAM1</i>  | 0.886    | 81  | <i>THBS1</i>    | 0.828    |
| 8  | <i>MERTK</i>    | 0.971    | 45 | <i>TAGAP</i>    | 0.886    | 82  | <i>NR3C2</i>    | 0.828    |
| 9  | <i>MPO</i>      | 0.971    | 46 | <i>PRG2</i>     | 0.857    | 83  | <i>NARF</i>     | 0.828    |
| 10 | <i>ARL4A</i>    | 0.971    | 47 | <i>DAAM2</i>    | 0.857    | 84  | <i>HCAR3</i>    | 0.828    |
| 11 | <i>CDKN3</i>    | 0.971    | 48 | <i>ORM1</i>     | 0.857    | 85  | <i>CFD</i>      | 0.828    |
| 12 | <i>PRTN3</i>    | 0.971    | 49 | <i>IFI44L</i>   | 0.857    | 86  | <i>CCNE2</i>    | 0.828    |
| 13 | <i>MTMR11</i>   | 0.971    | 50 | <i>SLCO4A1</i>  | 0.857    | 87  | <i>IFIT5</i>    | 0.828    |
| 14 | <i>ANLN</i>     | 0.971    | 51 | <i>BEX1</i>     | 0.857    | 88  | <i>CLEC4D</i>   | 0.828    |
| 15 | <i>IL1RAP</i>   | 0.971    | 52 | <i>IFIT1</i>    | 0.857    | 89  | <i>GADD45A</i>  | 0.828    |
| 16 | <i>HLA-DMB</i>  | 0.971    | 53 | <i>NELL2</i>    | 0.857    | 90  | <i>ROMO1</i>    | 0.828    |
| 17 | <i>ZBTB16</i>   | 0.971    | 54 | <i>RPS6KA5</i>  | 0.857    | 91  | <i>PADI4</i>    | 0.800    |
| 18 | <i>NUSAP1</i>   | 0.942    | 55 | <i>COL17A1</i>  | 0.857    | 92  | <i>NUF2</i>     | 0.800    |
| 19 | <i>GGH</i>      | 0.942    | 56 | <i>PARP8</i>    | 0.857    | 93  | <i>CEBPE</i>    | 0.800    |
| 20 | <i>MMP8</i>     | 0.942    | 57 | <i>CX3CR1</i>   | 0.857    | 94  | <i>UPP1</i>     | 0.800    |
| 21 | <i>PRC1</i>     | 0.942    | 58 | <i>TBC1D4</i>   | 0.857    | 95  | <i>CEACAM21</i> | 0.800    |
| 22 | <i>CD24</i>     | 0.942    | 59 | <i>TOP2A</i>    | 0.857    | 96  | <i>TSPAN13</i>  | 0.800    |
| 23 | <i>CTSL</i>     | 0.942    | 60 | <i>HSP90AA1</i> | 0.857    | 97  | <i>KLRF1</i>    | 0.800    |
| 24 | <i>MAFF</i>     | 0.942    | 61 | <i>TCEAL9</i>   | 0.857    | 98  | <i>TSPO</i>     | 0.800    |
| 25 | <i>NFE2</i>     | 0.942    | 62 | <i>ARG1</i>     | 0.857    | 99  | <i>DDAH2</i>    | 0.800    |
| 26 | <i>BLM</i>      | 0.942    | 63 | <i>SUCNR1</i>   | 0.857    | 100 | <i>GNA15</i>    | 0.800    |
| 27 | <i>OLFM4</i>    | 0.942    | 64 | <i>KIF14</i>    | 0.857    | 101 | <i>ASPM</i>     | 0.800    |
| 28 | <i>MAP3K7CL</i> | 0.942    | 65 | <i>TGFBI</i>    | 0.857    | 102 | <i>KCNE1</i>    | 0.800    |
| 29 | <i>CEACAM6</i>  | 0.914    | 66 | <i>OLAH</i>     | 0.857    | 103 | <i>CD3E</i>     | 0.800    |
| 30 | <i>FCER1A</i>   | 0.914    | 67 | <i>CR1L</i>     | 0.857    | 104 | <i>RTN1</i>     | 0.800    |
| 31 | <i>CEP55</i>    | 0.914    | 68 | <i>ETS2</i>     | 0.857    | 105 | <i>CTSO</i>     | 0.800    |
| 32 | <i>TLR7</i>     | 0.914    | 69 | <i>TUBG1</i>    | 0.857    | 106 | <i>CCL5</i>     | 0.800    |
| 33 | <i>GPI</i>      | 0.914    | 70 | <i>UHRF1</i>    | 0.857    | 107 | <i>CACNA2D3</i> | 0.800    |
| 34 | <i>SLC46A2</i>  | 0.914    | 71 | <i>CTSG</i>     | 0.828    | 108 | <i>NR1D2</i>    | 0.800    |
| 35 | <i>FCGR2B</i>   | 0.914    | 72 | <i>HGF</i>      | 0.828    | 109 | <i>DDX58</i>    | 0.800    |
| 36 | <i>SLC51A</i>   | 0.914    | 73 | <i>NDUFA1</i>   | 0.828    | 110 | <i>NKG7</i>     | 0.800    |
| 37 | <i>H1-2</i>     | 0.886    | 74 | <i>ZNF600</i>   | 0.828    | 111 | <i>LRG1</i>     | 0.800    |

5  
 6 \*Fraction: Indicates fraction of repeated cross-validation experiments in which the genes  
 7 identified were associated with persistent MODS trajectory.

1 **Table 7.** Gene set predictive of sepsis mortality published by Sweeney et al. listed in  
 2 alphabetical order used to predict risk of persistent MODS in the validation and test  
 3 datasets.  
 4

| #   | Gene            | #   | Gene            | #   | Gene                 |
|-----|-----------------|-----|-----------------|-----|----------------------|
| 1.  | <i>AIM2</i>     | 24. | <i>G0S2</i>     | 47. | <i>RGS1</i>          |
| 2.  | <i>APH1A</i>    | 25. | <i>GSTM1</i>    | 48. | <i>SEPP1</i>         |
| 3.  | <i>B4GALT4</i>  | 26. | <i>HIF1A</i>    | 49. | <i>TGFB1</i>         |
| 4.  | <i>BPI</i>      | 27. | <i>HIST1H3H</i> | 50. | <i>TRIB1</i>         |
| 5.  | <i>C11orf74</i> | 28. | <i>IFI27</i>    | 51. | <i>TST</i>           |
| 6.  | <i>CCR2</i>     | 29. | <i>IKZF2</i>    | 52. | <i>VNN3</i>          |
| 7.  | <i>CD163</i>    | 30. | <i>IL1R2*</i>   | 53. | <i>CIT (N/A)</i>     |
| 8.  | <i>CD24</i>     | 31. | <i>IL8</i>      | 54. | <i>PLK1 (N/A)</i>    |
| 9.  | <i>CD5</i>      | 32. | <i>KCNJ2</i>    | 55. | <i>OR52R1(N/A)</i>   |
| 10. | <i>CEACAM8*</i> | 33. | <i>LY86</i>     | 56. | <i>NT5E (N/A)</i>    |
| 11. | <i>CEP55</i>    | 34. | <i>MAFF</i>     | 57. | <i>ABCB4(N/A)</i>    |
| 12. | <i>CFD</i>      | 35. | <i>MKI67</i>    | 58. | <i>CBFA2T3 (N/A)</i> |
| 13. | <i>CKS2</i>     | 36. | <i>MPO*</i>     |     |                      |
| 14. | <i>CLEC10A</i>  | 37. | <i>MT1G</i>     |     |                      |
| 15. | <i>CST3</i>     | 38. | <i>MTMR11*</i>  |     |                      |
| 16. | <i>CTSG</i>     | 39. | <i>NDUFV2</i>   |     |                      |
| 17. | <i>CTSS</i>     | 40. | <i>OCLN</i>     |     |                      |
| 18. | <i>CX3CR1</i>   | 41. | <i>PAM</i>      |     |                      |
| 19. | <i>DDIT4*</i>   | 42. | <i>PER1</i>     |     |                      |
| 20. | <i>DEFA4</i>    | 43. | <i>POLD3</i>    |     |                      |
| 21. | <i>DHRS7B</i>   | 44. | <i>PSMA6</i>    |     |                      |
| 22. | <i>EIF5A</i>    | 45. | <i>RAB40B</i>   |     |                      |
| 23. | <i>EMR3</i>     | 46. | <i>RCBTB2</i>   |     |                      |

5  
 6 \*Indicates genes that overlap with those top 20 genes predictive of persistent MODS  
 7 trajectory identified in our gene set.

8  
 9 N/A -Indicates 6 genes that were not consistently found across the validation and test  
 10 sets used in our study to predict risk of persistent MODS.  
 11  
 12  
 13  
 14  
 15  
 16  
 17  
 18  
 19  
 20  
 21  
 22

1 **Supplementary Figure Legend:**

2  
3 **Figure 1.** Preprocessing of the expression measurements belonging to the derivation  
4 dataset. **(A,B):** The effect of normalization on the average gene expression values. The  
5 x-axis represents the samples, and the y-axis represents the gene expression values.  
6 Based on the figures, the average expression values of the samples were more stable  
7 and consistent after normalization and suitable for analysis. **(C)** Association of surrogate  
8 variables with the actual batch variable. Since the samples were processed at different  
9 time points spread over six years, we had to remove the resulting variation (batch  
10 effect) from the data using the `Combat()` in the “sva” package in R. The current figure  
11 shows the association between one of the inferred batch effects through SVA and the  
12 actual batch variable (year). We passed the full model (without any batch variable) and  
13 the batch variable as separate arguments to the `Combat()`. The output consists of a  
14 corrected expression set with the batch effects removed completely.

15  
16 **Figure 2.** Venn diagram showing number of genes identified between the different  
17 feature selection methods deployed least absolute shrinkage and selection operator  
18 (LASSO), Minimum Redundancy and Maximum Relevance (MRMR), and Random  
19 forests (RF) based variable importance technique AND the list of differentially  
20 expressed genes (DEGs) in the training dataset (GSE66099) across repeated cross-fold  
21 validation experiments.

1 **Supplementary Figures:**

2  
3 **Figure 1.**

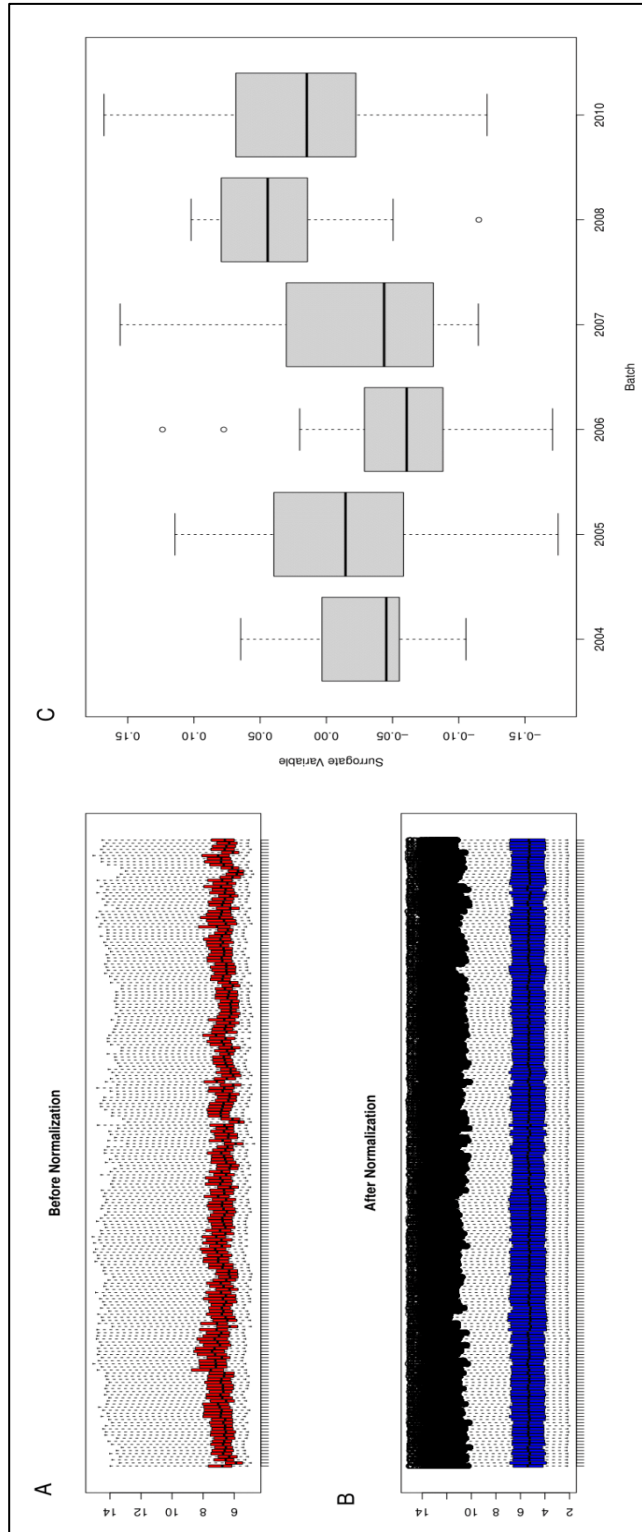



1 **Figure 2.**

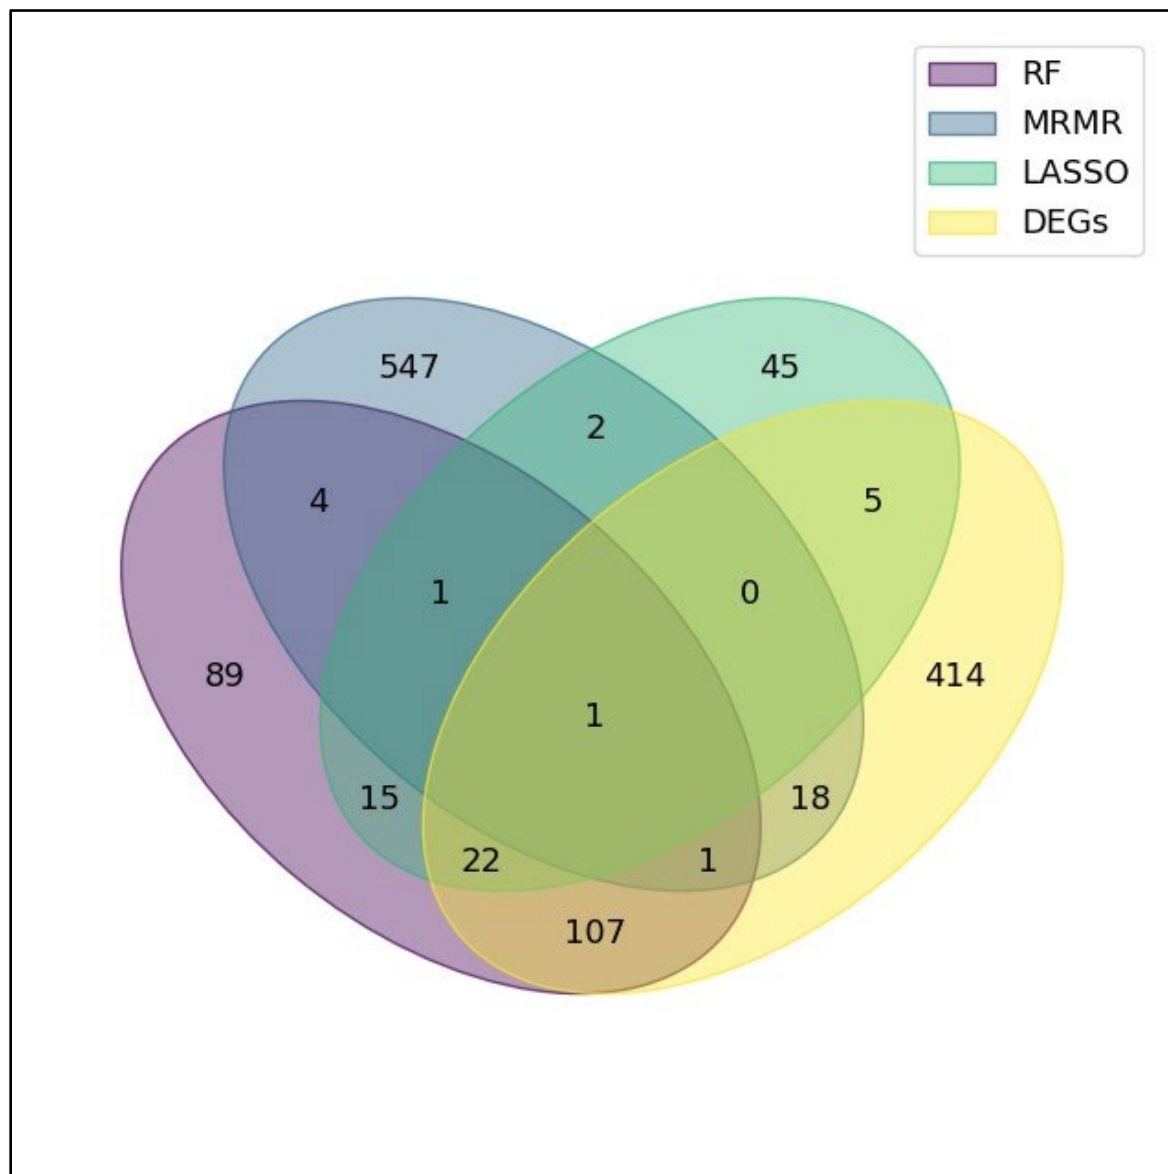

1 **References:**

2

3 1. Tibshirani, R. Regression Shrinkage and Selection via the Lasso. *Journal of the*

4 *Royal Statistical Society. Series B (Methodological)* **58**, 267–288 (1996).

5 2. Ding, C. & Peng, H. Minimum redundancy feature selection from microarray gene

6 expression data. *J Bioinform Comput Biol* **3**, 185–205 (2005).

7 3. Gregorutti, B., Michel, B. & Saint-Pierre, P. Correlation and variable importance in

8 random forests. *Stat Comput* **27**, 659–678 (2017).
